# Supplementary material
Source: PubMed Central journal article supplement (PMC3731164)
Supplement: NIHMS491706-supplement-1_si_001.pdf [file NIHMS491706-supplement-1_si_001.pdf]

## Supporting Information

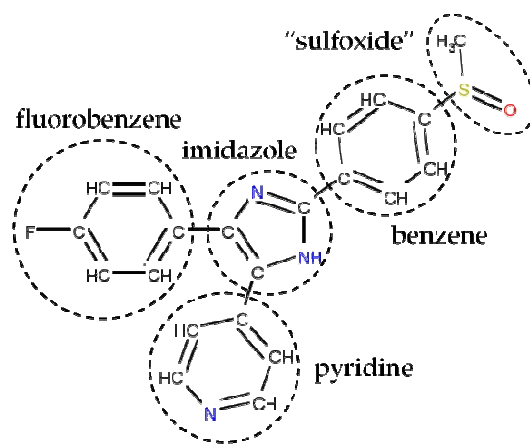

**Figure S1. Principal moieties of the inhibitor SB203580.** Each of the principal functional groups present in the inhibitor is labeled by a dashed circle. The carbon (and hydrogen), nitrogen, sulfur, and oxygen atoms are colored black, blue, yellow, and red, respectively.

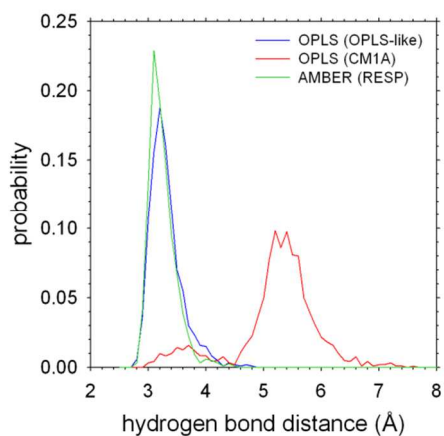

**Figure S2. Probability distribution function of the key hydrogen bond observed in simulations of the wild-type p38 $\alpha$ -SB203580 complex.** Simulations of the wild-type p38 $\alpha$  kinase in complex with SB203580 were performed for 12 ns with three different force fields: (a) OPLS-AA/L using partial charges for SB203580 derived by analogy (OPLS-like), (b) OPLS-AA/L using partial charges for SB203580 derived using the CM1A method (CM1A), and (c) Amber ff99SB-ILDN using partial charges for SB203580 derived using the conventional Amber methodology (RESP). In all cases, the hydrogen bond distance is defined in terms of its heavy atoms – i.e. the distance between the N of SB203580’s pyridine ring and the backbone N of Met 109 in p38 $\alpha$ .

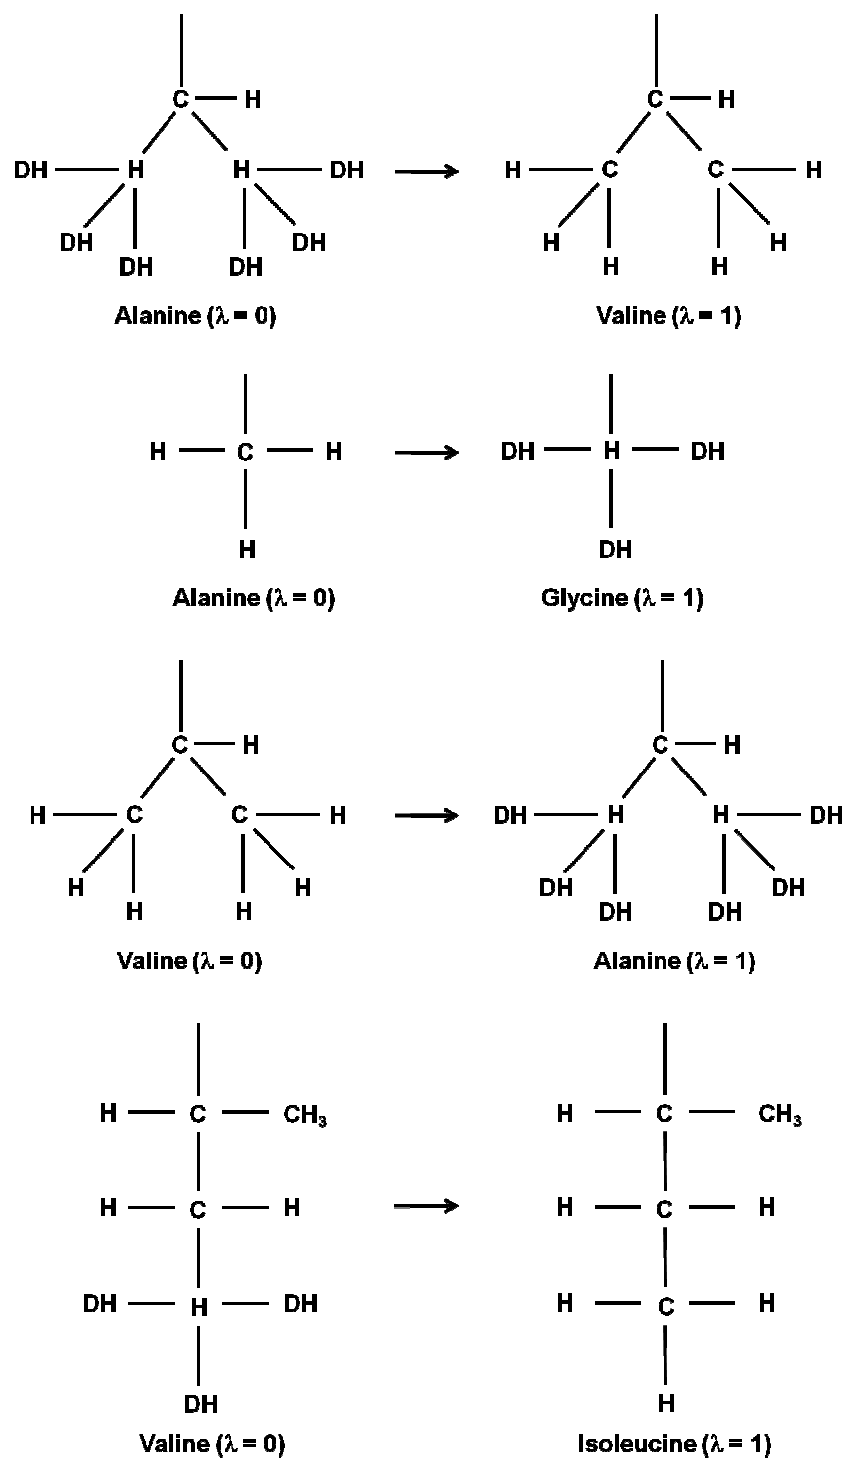

**Figure S3. Scheme for performing alchemical transformations of p38 $\alpha$  mutants.** Shown above from top to bottom are the transformations for four mutations: A51V, A51G, V38A, and V38I. “DH” denotes dummy hydrogen atoms. Only sidechain atoms are shown.

**Figure S4. Quadratic fits of the normalized fluorescence data obtained from titrations of p38 $\alpha$  protein with SB203580.** Each row represents the results of three independent experiments. Solid dots represent experimentally measured data while curves represent fits to the quadratic function. The  $R^2$  and  $K_d$  are included on top of each panel.

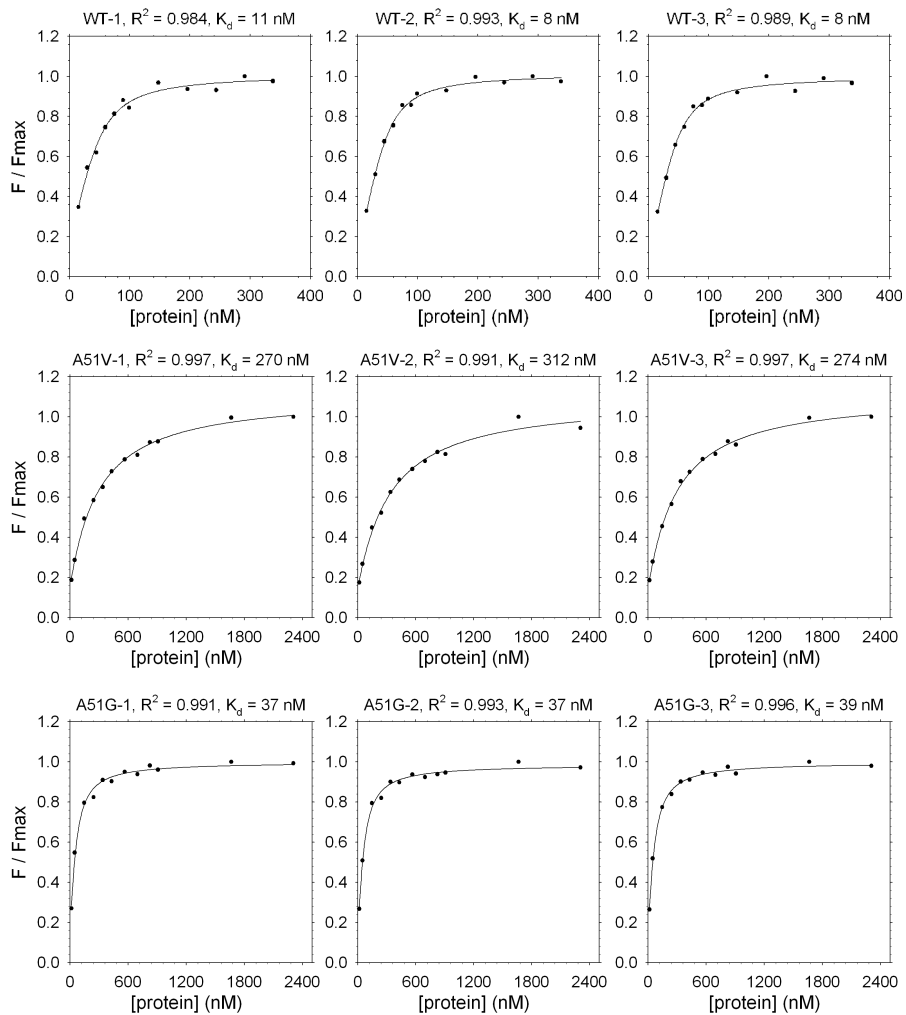

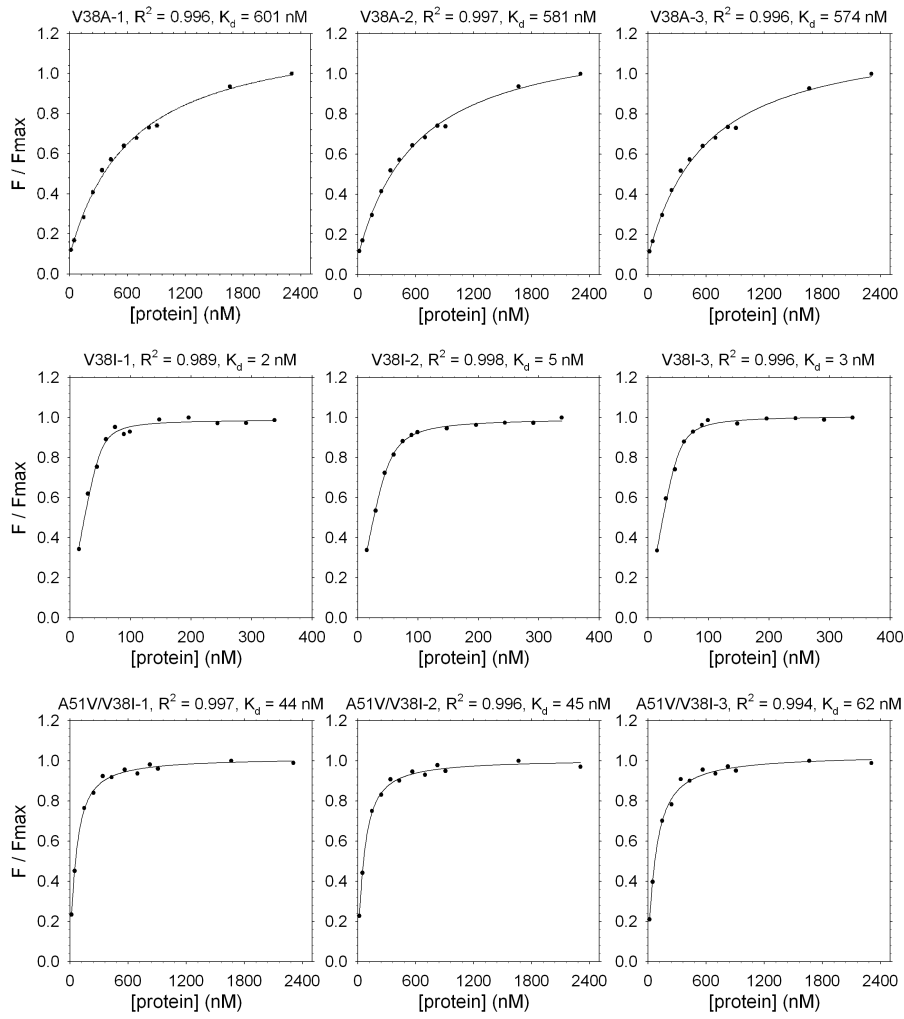

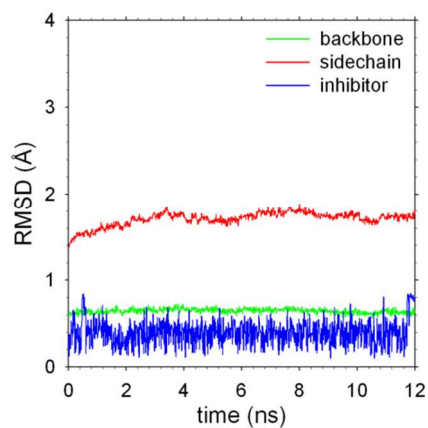

**Figure S5. Time dependence of root mean square deviations (RMSDs) for selected groups of atoms in harmonically restrained simulations of wild-type p38 $\alpha$  in complex with SB203580.** Backbone: the RMSD is calculated for all backbone atoms following alignment of the protein backbone atoms; Sidechain: the RMSD is calculated for all sidechain atoms following alignment of the protein backbone atoms; Inhibitor: the RMSD is calculated for all inhibitor atoms following alignment of the inhibitor atoms. Results are shown for simulations performed with the OPLS-AA/L force field and using a force constant for the position restraints of 0.239 kcal/mol/Å<sup>2</sup>.

**Figure S6. Plots of  $dH/d\lambda$  versus  $\lambda$  for unrestrained and restrained simulations of p38 $\alpha$  mutants using the OPLS-AA/L force field.** Data from simulations performed without position restraints and with positions restraints using force constants of 0.0239, 0.239, and 2.39 kcal/mol/Å<sup>2</sup> are shown in blue, green, yellow, and red dots, respectively.

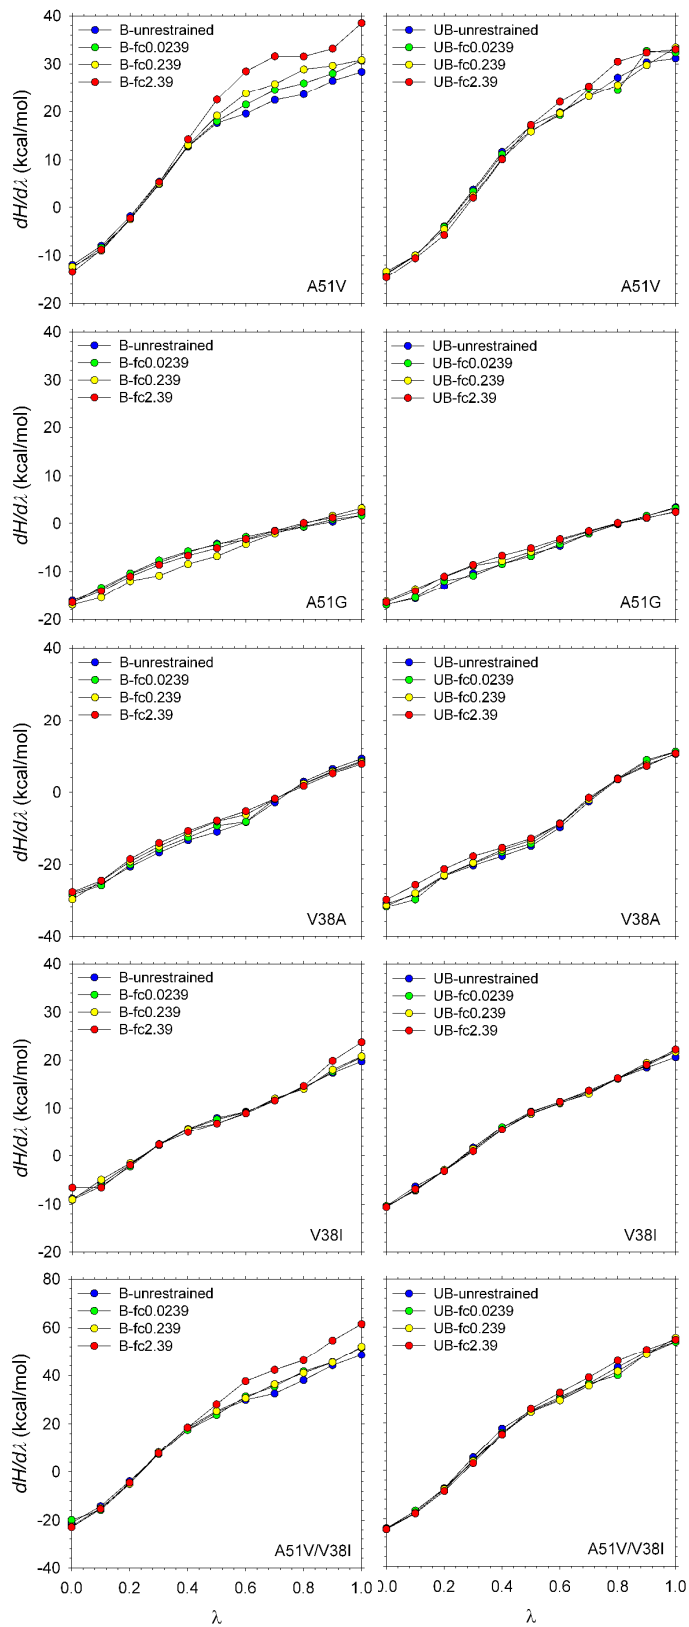



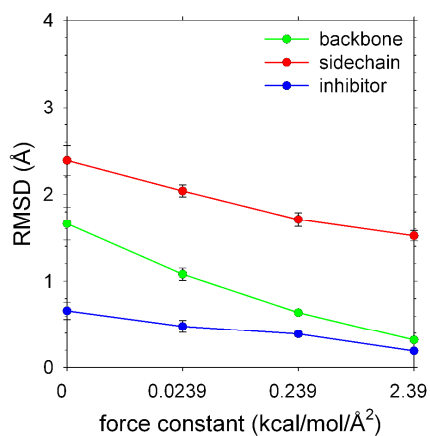

**Figure S7. Root mean square deviation (RMSD) versus force constant for 12 ns restrained simulations of wild-type p38 $\alpha$  kinase in complex with SB203580 using the OPLS-AA/L force field.** Calculations were done for simulations with four sets of force constants: (1) 0 kcal/mol/Å<sup>2</sup> (unrestrained); (2) 0.0239 kcal/mol/Å<sup>2</sup>; (3) 0.239 kcal/mol/Å<sup>2</sup>; (4) 2.39 kcal/mol/Å<sup>2</sup>. Backbone: the RMSD is calculated for all backbone atoms following alignment of the protein backbone atoms; Sidechain: the RMSD is calculated for all sidechain atoms following alignment of the protein backbone atoms; Inhibitor: the RMSD is calculated for all inhibitor atoms following alignment of the inhibitor atoms. Error bars were obtained from block averaging of 1ns simulation blocks.

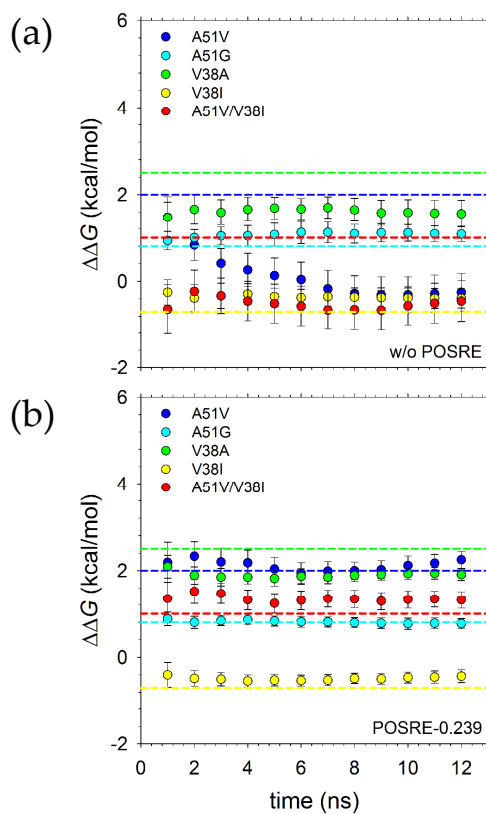

**Figure S8. Time dependence of  $\Delta\Delta G$  values calculated from simulations using the OPLS-AA/L force field.** Results from the unrestrained and restrained (force constant 0.239 kcal/mol/ $\text{\AA}^2$ ) simulations are shown in (a) and (b), respectively. The calculated  $\Delta\Delta G$  values are shown as solid circles and the corresponding experimental  $\Delta\Delta G$  values are shown as horizontal dashed lines of the same color. Each vertical error bar represents the standard deviation of  $3^{11}$  independent  $\Delta\Delta G$  estimates from three simulation repeats. In all cases, the ‘equilibration’ phase of the simulations was 0.6 ns.

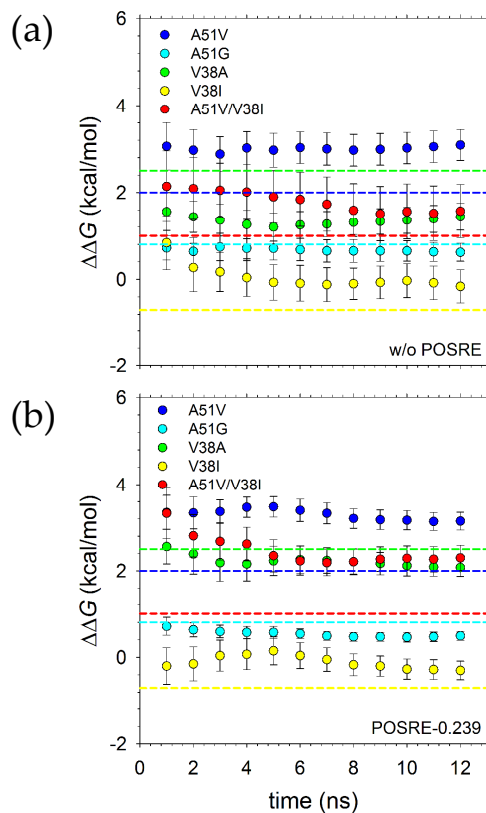

**Figure S9. Time dependence of  $\Delta\Delta G$  values calculated from simulations using the Amber ff99SB-LDN force field.** Results from the unrestrained and restrained (force constant 0.239 kcal/mol/ $\text{\AA}^2$ ) simulations are shown in (a) and (b), respectively. The calculated  $\Delta\Delta G$  values are shown as solid circles and the corresponding experimental  $\Delta\Delta G$  values are shown as horizontal dashed lines of the same color. Each vertical error bar represents the standard deviation of  $3^{11}$  independent  $\Delta\Delta G$  estimates from three simulation repeats. In all cases, the ‘equilibration’ phase of the simulations was 0.6 ns.

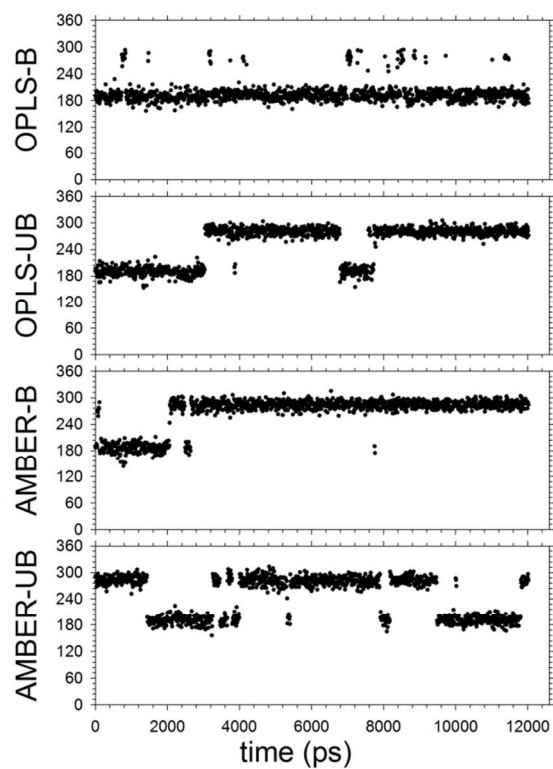

**Figure S10. Time dependence of  $\chi_1$  angles at residue 38 in simulations of the A51V mutant.** Angles of 60, 180, 300° correspond to the gauche-, trans, and gauche+ conformation, respectively.

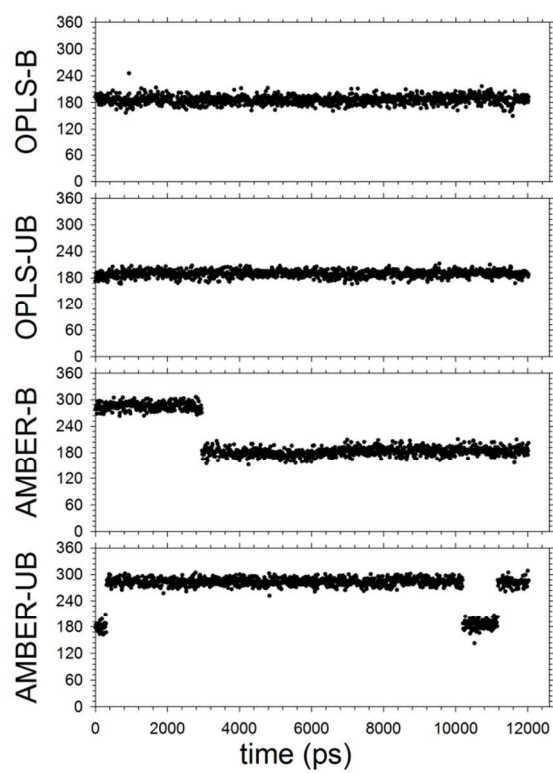

**Figure S11.** Time dependence of  $\chi_1$  angles at residue 38 in simulations of the V38I/A51V mutant. Angles of 60, 180, 300° correspond to the gauche-, trans, and gauche+ conformation, respectively.

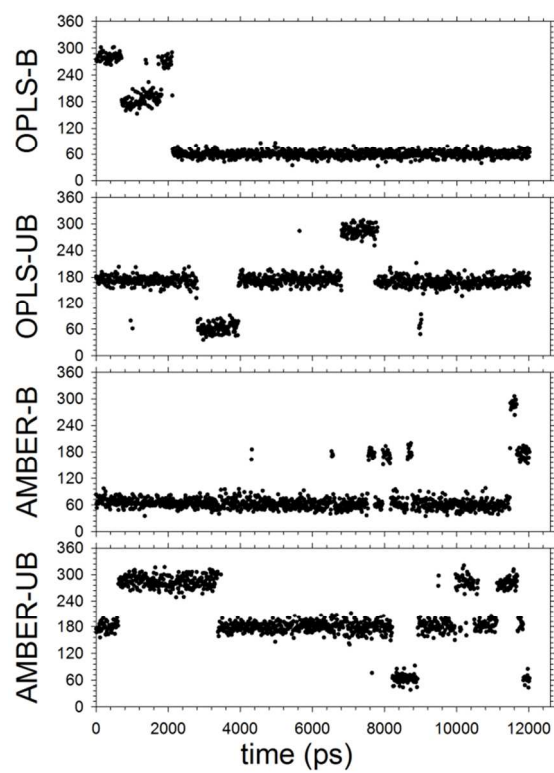

**Figure S12. Time dependence of  $\chi_1$  angles at residue 51 in simulations of the A51V mutant.** Angles of 60, 180, 300° correspond to the gauche-, trans, and gauche+ conformation, respectively.

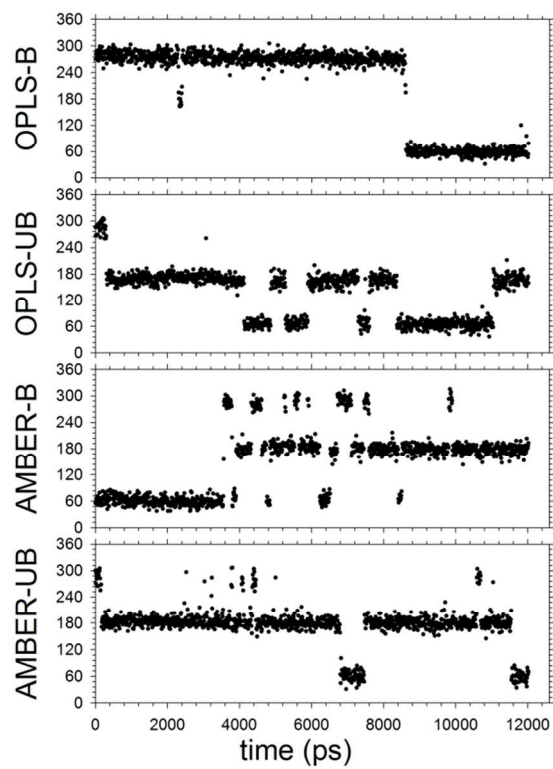

**Figure S13.** Time dependence of  $\chi_1$  angles at residue 51 in simulations of the V38I/A51V mutant. Angles of 60, 180, 300° correspond to the gauche-, trans, and gauche+ conformation, respectively.

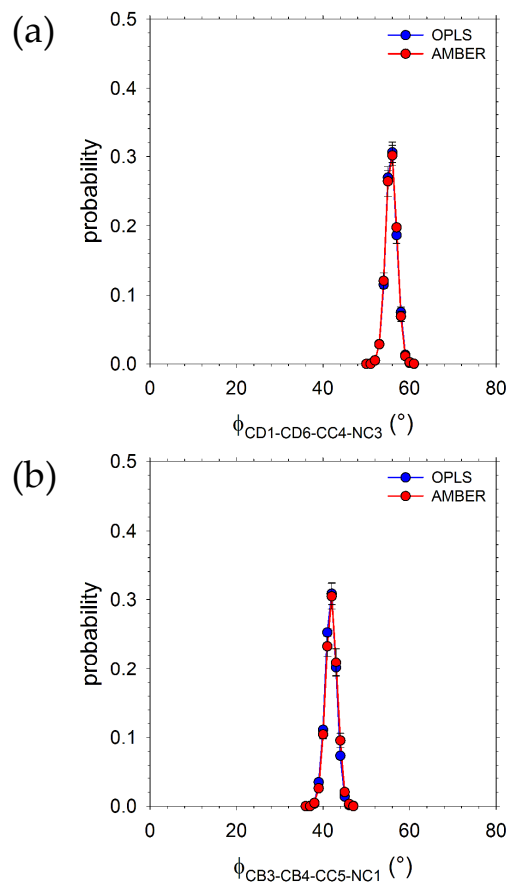

**Figure S14. Dihedral angle distributions for inter-ring bonds in the inhibitor in unrestrained simulations in complex with p38a.** Two dihedral angles are shown: (a) the dihedral angle that for the bond between the fluorophenyl and imidazole rings, i.e.,  $\phi_{CD1-CD6-CC4-NC3}$ ; (b) the dihedral angle for the bond between the pyridine ring and imidazole ring, i.e.,  $\phi_{CB3-CB4-CC5-NC1}$ . The results for OPLS-AA/L and Amber ff99SB-ILDN are shown in blue and red traces, respectively. The error bars were obtained from standard deviation of three 12 ns replicate simulations.



**Table S1. Three partial charge sets for the inhibitor SB203580.** Partial charges were derived using the CM1A method (CM1A), the analogy method (OPLS-like) and the RESP method (RESP), respectively. The correlation coefficient between pairs of charge sets are: 0.60 (CM1A/OPLS-like), 0.79 (CM1A/RESP), 0.87(OPLS-like/RESP).

| Atom name  | CM1A   | OPLS-like | RESP   | Atom name  | CM1A   | OPLS-like | RESP   |
|------------|--------|-----------|--------|------------|--------|-----------|--------|
| <i>CD1</i> | -0.081 | -0.115    | -0.129 | <i>H11</i> | 0.130  | 0.060     | 0.122  |
| <i>HD1</i> | +0.166 | 0.115     | 0.138  | <i>H12</i> | 0.139  | 0.060     | 0.122  |
| <i>CD2</i> | -0.188 | -0.115    | -0.227 | <i>H13</i> | 0.146  | 0.060     | 0.122  |
| <i>HD2</i> | +0.162 | 0.115     | 0.164  | <i>O2</i>  | -0.616 | -0.420    | -0.474 |
| <i>CD4</i> | -0.186 | -0.115    | -0.227 | <i>CA4</i> | -0.069 | -0.115    | -0.048 |
| <i>HD4</i> | 0.162  | 0.115     | 0.164  | <i>HA4</i> | 0.146  | 0.115     | 0.134  |
| <i>CD5</i> | -0.102 | -0.115    | -0.129 | <i>CA5</i> | -0.113 | -0.115    | -0.179 |
| <i>HD5</i> | 0.156  | 0.115     | 0.138  | <i>HA5</i> | 0.175  | 0.115     | 0.139  |
| <i>CD3</i> | 0.076  | 0.220     | 0.292  | <i>NC1</i> | -0.523 | -0.291    | -0.371 |
| <i>FD3</i> | -0.083 | -0.220    | -0.204 | <i>HC1</i> | 0.423  | 0.326     | 0.327  |
| <i>CD6</i> | -0.026 | -0.292    | 0.028  | <i>CC5</i> | 0.018  | -0.196    | -0.004 |
| <i>CC4</i> | 0.016  | 0.619     | 0.178  | <i>CB4</i> | 0.027  | 0.410     | 0.114  |
| <i>NC3</i> | -0.275 | -0.564    | -0.504 | <i>CB3</i> | -0.198 | -0.447    | -0.238 |
| <i>CC2</i> | 0.161  | 0.297     | 0.418  | <i>HB3</i> | 0.154  | 0.155     | 0.116  |
| <i>CA6</i> | 0.024  | -0.017    | -0.032 | <i>CB2</i> | 0.003  | 0.473     | 0.262  |
| <i>CA1</i> | -0.151 | -0.115    | -0.179 | <i>HB2</i> | 0.177  | 0.012     | 0.076  |
| <i>HA1</i> | 0.143  | 0.115     | 0.139  | <i>NB1</i> | -0.308 | -0.678    | -0.552 |
| <i>CA2</i> | -0.052 | -0.115    | -0.048 | <i>CB6</i> | 0.003  | 0.473     | 0.262  |
| <i>HA2</i> | 0.183  | 0.115     | 0.134  | <i>HB6</i> | 0.179  | 0.012     | 0.076  |
| <i>CA3</i> | -0.349 | 0.030     | 0.022  | <i>CB5</i> | -0.172 | -0.447    | -0.238 |
| <i>S1</i>  | 0.818  | 0.245     | 0.229  | <i>HB5</i> | 0.174  | 0.155     | 0.117  |
| <i>C1</i>  | -0.469 | -0.035    | -0.250 |            |        |           |        |

**Table S2. Additional dihedral restraints applied to SB203580 to maintain its "propeller-like" shape.** The units for the angle and force constant (fc) are in degrees and kJ/mol/rad<sup>2</sup>, respectively.

| <b>i</b> | <b>j</b> | <b>k</b> | <b>l</b> | <b>type</b> | <b>label</b> | <b><math>\phi</math></b> | <b><math>\Delta\phi</math></b> | <b>fc</b> | <b>power</b> |
|----------|----------|----------|----------|-------------|--------------|--------------------------|--------------------------------|-----------|--------------|
| CB5      | CB4      | CC5      | CC4      | 1           | 1            | 42.99                    | 0                              | 4184      | 2            |
| CB5      | CB4      | CC5      | NC1      | 1           | 1            | -138.65                  | 0                              | 4184      | 2            |
| CB3      | CB4      | CC5      | CC4      | 1           | 1            | -136.12                  | 0                              | 4184      | 2            |
| CB3      | CB4      | CC5      | NC1      | 1           | 1            | 42.23                    | 0                              | 4184      | 2            |
| CD1      | CD6      | CC4      | NC3      | 1           | 1            | 56.05                    | 0                              | 4184      | 2            |
| CD1      | CD6      | CC4      | CC5      | 1           | 1            | -124.05                  | 0                              | 4184      | 2            |
| CD5      | CD6      | CC4      | NC3      | 1           | 1            | -122.52                  | 0                              | 4184      | 2            |
| CD5      | CD6      | CC4      | CC5      | 1           | 1            | 57.38                    | 0                              | 4184      | 2            |
